# Supplementary material
Source: ML conference proceedings conference paper supplement (https://proceedings.neurips.cc/paper_files/paper/2014/hash/58ae749f25eded36f486bc85feb3f0ab-Abstract.html)
Supplement: Supplementary file [file 58ae749f25eded36f486bc85feb3f0ab-Supplemental.zip]

---

# Self-Adaptable Templates for Feature Coding

---

**Xavier Boix<sup>1,2\*</sup> Gemma Roig<sup>1,2\*</sup> Salomon Diether<sup>1</sup> Luc Van Gool<sup>1</sup>**

<sup>1</sup>Computer Vision Laboratory, ETH Zurich, Switzerland

<sup>2</sup>LCSL, Massachusetts Institute of Technology & Istituto Italiano di Tecnologia, Cambridge, MA

{xboix, gemmar}@mit.edu

{boxavier, gemmar, sdiether, vangool}@vision.ee.ethz.ch

In the following Supplementary Material, we introduce the additional information and derivations that we promised in the main paper.

## 1 TR as Coding-Pooling based on Pattern Similarities

### 1.1 Derivation of $\langle \mathbf{y}^r, \mathbf{y}^s \rangle$ in TR

Recall that the final output vector in TR is  $\mathbf{y} = \text{vec}(\log(\mathbf{K})) = \text{vec}(\sum_{k < M} \log(\lambda_k) \mathbf{e}_k \mathbf{e}_k^t)$ , where  $\mathbf{e}_k$  are the eigenvectors of  $\mathbf{K}$ , and  $\lambda_k$  the corresponding eigenvalues.  $\mathbf{K}$  is the correlation matrix of the input set of vectors,  $\mathbf{K} = \frac{1}{N} \sum_{i < N} \mathbf{x}_i \mathbf{x}_i^t$ . The  $\text{vec}(\cdot)$  operator vectorizes  $\log(\mathbf{K})$ , and  $\mathbf{x}_i^t$  is the transpose of vector  $\mathbf{x}_i$ .

Also, recall that we denote  $\langle \mathbf{y}^r, \mathbf{y}^s \rangle$  as the inner product between  $\mathbf{y}^r$  and  $\mathbf{y}^s$ , which are the final representation vectors from two sets of input feature vectors,  $\{\mathbf{x}_i^r\}_N$  and  $\{\mathbf{x}_i^s\}_N$ , respectively, where we use the superscripts  $r$  and  $s$  to indicate the respective representation for each set.

We re-write the definition of TR with  $\langle \mathbf{y}^r, \mathbf{y}^s \rangle$ .  $\langle \mathbf{y}^r, \mathbf{y}^s \rangle$  becomes

$$\langle \mathbf{y}^r, \mathbf{y}^s \rangle = \sum_{k < M} \sum_{q < M} \log(\lambda_k^r) \log(\lambda_q^s) \text{tr}((\mathbf{e}_k^r \mathbf{e}_k^{rt})(\mathbf{e}_q^s \mathbf{e}_q^{st})). \quad (1)$$

The derivation of the above equation is

$$\langle \mathbf{y}^r, \mathbf{y}^s \rangle = \quad (2)$$

$$\text{vec} \left( \sum_{k < M} \log(\lambda_k^r) \mathbf{e}_k^r \mathbf{e}_k^{rt} \right)^t \text{vec} \left( \sum_{q < M} \log(\lambda_q^s) \mathbf{e}_q^s \mathbf{e}_q^{st} \right) = \quad (3)$$

$$\text{tr} \left( \sum_{k < M} \log(\lambda_k^r) (\mathbf{e}_k^r \mathbf{e}_k^{rt}) \sum_{q < M} \log(\lambda_q^s) (\mathbf{e}_q^s \mathbf{e}_q^{st}) \right) = \quad (4)$$

$$\sum_{k < M} \sum_{q < M} \log(\lambda_k^r) \log(\lambda_q^s) \text{tr}((\mathbf{e}_k^r \mathbf{e}_k^{rt})(\mathbf{e}_q^s \mathbf{e}_q^{st})), \quad (5)$$

where the last equation is the same as Eq. (1). In the derivation from Eq. (3) to Eq. (4) we use the property  $\text{vec}(\mathbf{A})^t \text{vec}(\mathbf{B}) = \text{tr}(\mathbf{A}^t \mathbf{B})$ , where  $\text{tr}(\cdot)$  is the trace function of a matrix. From Eq. (4) to Eq. (5) we reorder the terms, and take out of the trace function the  $\log(\lambda_k)$ , which is a scalar.

Finally, we rewrite Eq. (5) using the following equivalence  $\text{tr}((\mathbf{u}\mathbf{u}^t)(\mathbf{v}\mathbf{v}^t)) = (\mathbf{u}^t \mathbf{v})^2 = \langle \mathbf{u}, \mathbf{v} \rangle^2$ , and it becomes:

$$\langle \mathbf{y}^r, \mathbf{y}^s \rangle = \sum_{k < M} \sum_{q < M} \log(\lambda_k^r) \log(\lambda_q^s) \langle \mathbf{e}_k^r, \mathbf{e}_q^s \rangle^2. \quad (6)$$

---

\*Both first authors contributed equally.
